# Supplementary material
Source: publisher figshare collection journal article supplement (https://gsajournals.figshare.com/ndownloader/files/13879004)
Supplement: Supplementary file 1 [file 13879004]

Table S10 Predicted genes involved in translation system of *M. dispar* GS01 genome

| Locus | Product | Gene | Type | Protein length (aa) | Position |
| --- | --- | --- | --- | --- | --- |
| M.dispar-GS01_GM000003 | tRNA U34 5-carboxymethylaminomethyl modifying enzyme MnmG/GidA | *MnmG* | ribosomal structure and biogenesis | 619 | 2797…4656 |
| M.dispar-GS01_GM000012 | arginyl-tRNA synthetase | *argS* | aminoacyl-trna biosynthesis | 534 | 12872…14476 |
| M.dispar-GS01_GM000016 | Asp-tRNAAsn/Glu-tRNAGln amidotransferase C subunit | *gatC* | aminoacyl-trna biosynthesis | 97 | 16660…16953 |
| M.dispar-GS01_GM000017 | glutamyl-tRNA amidotransferase subunit A | *gatA* | aminoacyl-trna biosynthesis | 439 | 16946…18265 |
| M.dispar-GS01_GM000018 | glutamyl-tRNA amidotransferase subunit B | *gatB* | aminoacyl-trna biosynthesis | 470 | 18255…19667 |
| M.dispar-GS01_GM000020 | isoleucyl-tRNA synthetase | *ileS* | aminoacyl-trna biosynthesis | 886 | 20400…23060 |
| M.dispar-GS01_GM000028 | ribonuclease R | *rnr* | ribosomal structure and biogenesis | 696 | 32196…34286 |
| M.dispar-GS01_GM000053 | 30S ribosomal protein S2 | *rpsB* | ribosome | 341 | 53743…54768 |
| M.dispar-GS01_GM000054 | elongation factor EF-T | *tsf* | ribosomal structure and biogenesis | 299 | 54771…55670 |
| M.dispar-GS01_GM000056 | glycyl-tRNA synthetase | *glyS* | aminoacyl-trna biosynthesis | 455 | 57097…58464 |
| M.dispar-GS01_GM000061 | tyrosyl tRNA synthetase | *tyrS* | aminoacyl-trna biosynthesis | 414 | 63959…65203 |
| M.dispar-GS01_GM000072 | Translation elongation factor EF-4 | *lepA* | ribosomal structure and biogenesis | 598 | 81049…82845 |
| M.dispar-GS01_GM000085 | 50S ribosomal protein L7/L12 | *rplL* | ribosome | 121 | 108519…108884 |
| M.dispar-GS01_GM000086 | 50S ribosomal protein L10 | *rplJ* | ribosome | 165 | 108898…109395 |
| M.dispar-GS01_GM000115 | ribosomal large subunit pseudouridine synthase B | *rluB* | ribosomal structure and biogenesis | 233 | 153735…154436 |
| M.dispar-GS01_GM000118 | hemolysin A | *tlyA* | ribosomal structure and biogenesis | 237 | 155976…156689 |
| M.dispar-GS01_GM000124 | endoribonuclease YbeY | *ybeY* | ribosomal structure and biogenesis | 150 | 162058…162510 |
| M.dispar-GS01_GM000129 | 30S ribosomal protein S20 | *rpsT* | ribosome | 90 | 166426…166698 |
| M.dispar-GS01_GM000141 | ribonucleotide-diphosphate reductase subunit beta | *nrdF* | ribosomal structure and biogenesis | 348 | 182954…184000 |
| M.dispar-GS01_GM000151 | histidyl-tRNA synthetase | *hisS* | aminoacyl-trna biosynthesis | 428 | 195826…197112 |
| M.dispar-GS01_GM000152 | aspartyl-tRNA synthetase | *aspS* | aminoacyl-trna biosynthesis | 569 | 197105…198814 |
| M.dispar-GS01_GM000154 | 30S ribosomal protein S4 | *rpsD* | ribosome | 205 | 199019…199636 |
| M.dispar-GS01_GM000183 | 50S ribosomal protein L28 | *rpmB* | ribosome | 64 | 224132…224326 |
| M.dispar-GS01_GM000184 | 50S ribosomal protein L20 | *rplT* | ribosome | 118 | 224392…224748 |
| M.dispar-GS01_GM000185 | 50S ribosomal protein L35 | *rpmI* | ribosome | 64 | 224802…224996 |
| M.dispar-GS01_GM000186 | translation initiation factor IF-3 | *infC* | ribosomal structure and biogenesis | 216 | 224989…225639 |
| M.dispar-GS01_GM000193 | 50S ribosomal protein L21 | *rplU* | ribosome | 99 | 230553…230852 |
| M.dispar-GS01_GM000194 | 50S ribosomal protein L27 | *rpmA* | ribosome | 84 | 230861…231115 |
| M.dispar-GS01_GM000205 | peptide chain release factor 1 | *prfA* | ribosomal structure and biogenesis | 367 | 248415…249518 |
| M.dispar-GS01_GM000207 | glutamyl-tRNA synthetase | *gltX* | ribosomal structure and biogenesis | 467 | 250283…251686 |
| M.dispar-GS01_GM000209 | tRNA/rRNA methyltransferase | *cspR* | ribosomal structure and biogenesis | 174 | 252077…252601 |
| M.dispar-GS01_GM000241 | alanyl-tRNA synthetase | *alaS* | aminoacyl-trna biosynthesis | 519 | 287535…289094 |
| M.dispar-GS01_GM000245 | Peptidyl-tRNA hydrolase | *pth* | ribosomal structure and biogenesis | 184 | 291062…291616 |
| M.dispar-GS01_GM000248 | lysyl-tRNA synthetase | *lysS* | aminoacyl-trna biosynthesis | 488 | 294930…296396 |
| M.dispar-GS01_GM000248 | lysyl-tRNA synthetase, class II | *lysS* | ribosomal structure and biogenesis | 488 | 294930…296396 |
| M.dispar-GS01_GM000259 | Asparaginyl-tRNA synthetase | *asnS* | aminoacyl-trna biosynthesis | 449 | 315628…316977 |
| M.dispar-GS01_GM000269 | 30S ribosomal protein S16 | *rpsP* | ribosome | 106 | 333504…333824 |
| M.dispar-GS01_GM000270 | tRNA (guanine-N1-)-methyltransferase | *trmD* | ribosomal structure and biogenesis | 227 | 333843…334526 |
| M.dispar-GS01_GM000271 | 50S ribosomal protein L19 | *rplS* | ribosome | 121 | 334593…334958 |
| M.dispar-GS01_GM000281 | tRNA pseudouridine synthase B | *truB* | ribosomal structure and biogenesis | 279 | 349128…349967 |
| M.dispar-GS01_GM000282 | 50S ribosomal protein L32 | *rpmF* | ribosome | 99 | 350547…350846 |
| M.dispar-GS01_GM000283 | phenylalanyl-tRNA synthetase beta chain | *pheT* | aminoacyl-trna biosynthesis | 719 | 350816…352975 |
| M.dispar-GS01_GM000284 | phenylalanyl-tRNA synthetase alpha chain | *pheS* | aminoacyl-trna biosynthesis | 226 | 352982…353662 |
| M.dispar-GS01_GM000305 | 0S ribosomal protein S10 | *rpsJ* | ribosome | 106 | 383537…383857 |
| M.dispar-GS01_GM000306 | 50S ribosomal protein L3 | *rplC* | ribosome | 231 | 383859…384554 |
| M.dispar-GS01_GM000307 | 50S ribosomal protein L4 | *rplD* | ribosome | 214 | 384547…385191 |
| M.dispar-GS01_GM000308 | 50S ribosomal protein L23 | *rplW* | ribosome | 171 | 385195…385710 |
| M.dispar-GS01_GM000309 | 50S ribosomal protein L2 | *rplB* | ribosome | 282 | 385710…386558 |
| M.dispar-GS01_GM000310 | 30s ribosomal protein S19 | *rpsS* | ribosome | 91 | 386558…386833 |
| M.dispar-GS01_GM000311 | 50S ribosomal protein L22 | *rplV* | ribosome | 183 | 386849…387400 |
| M.dispar-GS01_GM000312 | 30S ribosomal protein S3 | *rpsC* | ribosome | 227 | 387400…388083 |
| M.dispar-GS01_GM000313 | 50S ribosomal protein L16 | *rplP* | ribosome | 136 | 388086…388496 |
| M.dispar-GS01_GM000314 | 50S ribosomal protein L29 | *rpmC* | ribosome | 121 | 388504…388869 |
| M.dispar-GS01_GM000315 | 30s ribosomal protein S17 | *rpsQ* | ribosome | 98 | 388862…389158 |
| M.dispar-GS01_GM000316 | 50S ribosomal protein L14 | *rplN* | ribosome | 122 | 389160…389528 |
| M.dispar-GS01_GM000317 | 50S ribosomal protein L24 | *rplX* | ribosome | 107 | 389531…389854 |
| M.dispar-GS01_GM000318 | 50S ribosomal protein L5 | *rplE* | ribosome | 197 | 389808…390401 |
| M.dispar-GS01_GM000319 | 30S ribosomal protein S8 | *rpsH* | ribosome | 131 | 390658…391053 |
| M.dispar-GS01_GM000320 | 50S ribosomal protein L6 | *rplF* | ribosome | 179 | 391063…391602 |
| M.dispar-GS01_GM000321 | 50S ribosomal protein L18 | *rplR* | ribosome | 121 | 391605…391970 |
| M.dispar-GS01_GM000322 | 30S ribosomal protein S5 | *rpsE* | ribosome | 221 | 391972…392637 |
| M.dispar-GS01_GM000323 | 50S ribosomal protein L15 | *rplO* | ribosome | 150 | 392787…393239 |
| M.dispar-GS01_GM000326 | methionyl aminopeptidase | *map* | ribosomal structure and biogenesis | 250 | 395338…396090 |
| M.dispar-GS01_GM000327 | Translation initiation factor IF-1 | *infA* | ribosomal structure and biogenesis | 75 | 396092…396319 |
| M.dispar-GS01_GM000328 | 30S ribosomal protein S13 | *rpsM* | ribosome | 137 | 396630…397043 |
| M.dispar-GS01_GM000329 | 30S ribosomal protein S11 | *rpsK* | ribosome | 134 | 397046…397450 |
| M.dispar-GS01_GM000331 | 50S ribosomal protein L17 | *rplQ* | ribosome | 120 | 398464…398826 |
| M.dispar-GS01_GM000344 | 30S ribosomal protein S6 | *rpsF* | ribosome | 232 | 432155…432853 |
| M.dispar-GS01_GM000346 | 30S ribosomal protein S18 | *rpsR* | ribosome | 88 | 433487…433753 |
| M.dispar-GS01_GM000347 | Ribosome-binding ATPase YchF | *YchF* | ribosomal structure and biogenesis | 367 | 433762…434865 |
| M.dispar-GS01_GM000359 | 50S ribosomal protein L31 | *rpmE* | ribosome | 73 | 452643…452864 |
| M.dispar-GS01_GM000363 | 50S ribosomal protein L11 | *rplK* | ribosome | 177 | 454590…455123 |
| M.dispar-GS01_GM000364 | 50S ribosomal protein L1 | *rplA* | ribosome | 231 | 455123…455818 |
| M.dispar-GS01_GM000405 | prolyl-tRNA synthetase | *proS* | aminoacyl-trna biosynthesis | 479 | 521526…522965 |
| M.dispar-GS01_GM000410 | DNA-binding transcriptional regulator and inhibitor of RsmH methyltransferase activity | *mraZ* | ribosomal structure and biogenesis | 146 | 525719…526159 |
| M.dispar-GS01_GM000411 | 16S rRNA C1402 N4-methylase RsmH | *rsmH* | ribosomal structure and biogenesis | 295 | 526161…527048 |
| M.dispar-GS01_GM000414 | tRNA1(Val) A37 N6-methylase TrmN6 | *TrmN* | ribosomal structure and biogenesis | 257 | 529295…530068 |
| M.dispar-GS01_GM000415 | methionyl-tRNA synthetase | *metG* | aminoacyl-trna biosynthesis | 514 | 530061…531605 |
| M.dispar-GS01_GM000418 | ribonuclease III | *rnc* | ribosome biogenesis | 227 | 533060…533743 |
| M.dispar-GS01_GM000438 | translation elongation factor EF-Tu | *tuf* | ribosomal structure and biogenesis | 402 | 569477…570685 |
| M.dispar-GS01_GM000457 | transcriptional regulatory protein YebC | *-* | ribosomal structure and biogenesis | 241 | 588791…589516 |
| M.dispar-GS01_GM000466 | tRNA G46 methylase TrmB | *trmB* | ribosomal structure and biogenesis | 201 | 599895…600500 |
| M.dispar-GS01_GM000479 | tRNA U34 2-thiouridine synthase MnmA/TrmU | *mnmA* | ribosomal structure and biogenesis | 377 | 617948…619081 |
| M.dispar-GS01_GM000482 | Translation elongation factor P (EF-P) | *efp* | ribosomal structure and biogenesis | 196 | 622068…622658 |
| M.dispar-GS01_GM000578 | Translation initiation factor IF-2 | *infB* | ribosomal structure and biogenesis | 599 | 755789…757588 |
| M.dispar-GS01_GM000579 | ribosome-binding factor A | *rbfA* | ribosomal structure and biogenesis | 127 | 757601…757984 |
| M.dispar-GS01_GM000633 | ribonuclease HII | *rnhC* | ribosomal structure and biogenesis | 246 | 823517…824257 |
| M.dispar-GS01_GM000636 | Tryptophanyl-tRNA synthetase | *trpS* | aminoacyl-trna biosynthesis | 327 | 827908…828891 |
| M.dispar-GS01_GM000637 | threonyl-tRNA synthase | *thrS* | aminoacyl-trna biosynthesis | 579 | 828895…830634 |
| M.dispar-GS01_GM000698 | ribosome recycling factor | *frr* | ribosomal structure and biogenesis | 198 | 911693…912289 |
| M.dispar-GS01_GM000715 | 16S rRNA C1402 (ribose-2'-O) methylase RsmI | *rsmI* | ribosomal structure and biogenesis | 241 | 934493…935218 |
| M.dispar-GS01_GM000725 | seryl-tRNA synthetase | *serS* | aminoacyl-trna biosynthesis | 413 | 942764…944005 |
| M.dispar-GS01_GM000728 | Putative ribosome biogenesis GTPase RsgA | *rsgA* | ribosomal structure and biogenesis | 285 | 946214…947071 |
| M.dispar-GS01_GM000735 | Ribosome biogenesis GTPase A | *rbgA* | ribosomal structure and biogenesis | 272 | 953878…954696 |
| M.dispar-GS01_GM000738 | mRNA degradation ribonuclease J1/J2 | *-* | ribosomal structure and biogenesis | 835 | 959098…961605 |
| M.dispar-GS01_GM000761 | 30S ribosomal protein S15 | *rpsO* | ribosome | 103 | 989251…989562 |
| M.dispar-GS01_GM000763 | Translation elongation factor EF-G | *fusA* | ribosomal structure and biogenesis | 694 | 989828…991912 |
| M.dispar-GS01_GM000764 | 30S ribosomal protein S7 | *rpsG* | ribosome | 156 | 991925…992395 |
| M.dispar-GS01_GM000765 | 30S ribosomal protein S12 | *rpsL* | ribosome | 145 | 992450…992887 |
| M.dispar-GS01_GM000773 | 16S rRNA A1518 and A1519 N6-dimethyltransferase RsmA/KsgA/DIM1 | *rsmA* | ribosomal structure and biogenesis | 258 | 999004…999780 |
| M.dispar-GS01_GM000774 | 50S ribosomal protein L13 | *rplM* | ribosome | 144 | 999925…1000359 |
| M.dispar-GS01_GM000775 | 30S ribosomal protein S9 | *rpsI* | ribosome | 132 | 1000364…1000762 |
| M.dispar-GS01_GM000779 | leucyl-tRNA synthetase | *leuS* | aminoacyl-trna biosynthesis | 791 | 1004052…1006427 |
| M.dispar-GS01_GM000781 | 50S ribosomal protein L9 | *rplI* | ribosome | 145 | 1008409…1008846 |
| M.dispar-GS01_GM000785 | cysteinyl-tRNA synthetase | *cysS* | aminoacyl-trna biosynthesis | 403 | 1012116…1013327 |
| M.dispar-GS01_GM000790 | tRNA A37 threonylcarbamoyltransferase TsaD | *tsaD* | ribosomal structure and biogenesis | 322 | 1016354…1017322 |
| M.dispar-GS01_GM000798 | 50S ribosomal protein L33 2 | *rpmG* | ribosome | 36 | 1027745…1027855 |
| M.dispar-GS01_GM000820 | valyl-tRNA synthetase | *valS* | aminoacyl-trna biosynthesis | 831 | 1056905…1059400 |
| M.dispar-GS01_GM000824 | ribonuclease P protein component | *rnpA* | ribosomal structure and biogenesis | 112 | 1065107…1065445 |
| M.dispar-GS01_GM000825 | 50S ribosomal protein L34 | *rpmH* | ribosomal structure and biogenesis | 26 | 1065460…1065540 |
